# Supplementary material for: Construction of CuCo2O4@CuCo2O4 hierarchical nanowire arrays grown on Ni foam for high-performance supercapacitors
Source: Royal Society of Chemistry journal article supplement (doi:10.1039/c6ra25970g), 2017-01-01
Supplement: c6ra25970g1.pdf [file c6ra25970g1.pdf]

## Support Information

### **Construction of $\text{CuCo}_2\text{O}_4@\text{CuCo}_2\text{O}_4$ hierarchical nanowire arrays grown on Ni foam for high-performance supercapacitors**

Yan Zhang, Jie Xu\*, Yayun Zheng, Yingjiu Zhang\*, Xing Hu, Tingting Xu

*School of Physical Engineering and Key Laboratory of Material Physics, Ministry of Education,*

*Zhengzhou University, NO. 75, Daxue Road, Zhengzhou 450052, China*

\* Corresponding author: Tel. +86 371 67766870, Fax. +86 371 67766629

*E-mail address: [xujie@zzu.edu.cn](mailto:xujie@zzu.edu.cn); [zhangyj2006@zzu.edu.cn](mailto:zhangyj2006@zzu.edu.cn)*

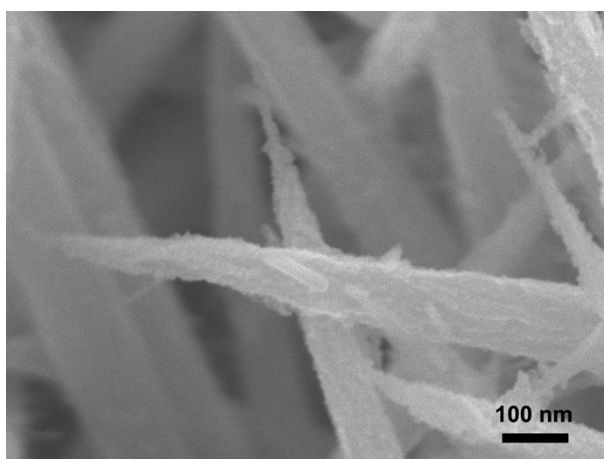

**Fig. S1.** High magnification SEM image of  $\text{CuCo}_2\text{O}_4@\text{CuCo}_2\text{O}_4$  hierarchical nanowire arrays on Ni foam.

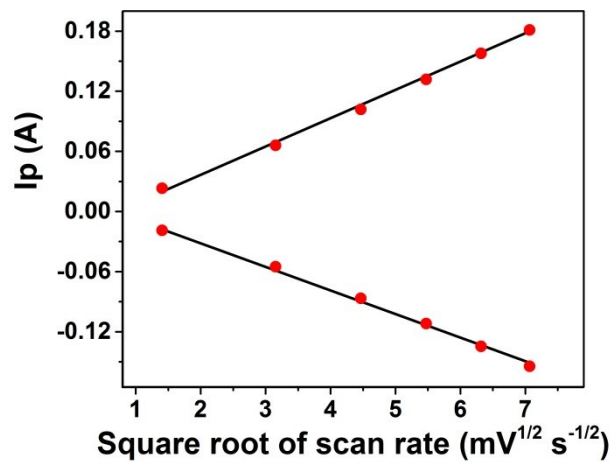

**Fig. S2** Plots of peak current vs. the square root of scan rate of CV curves of  $\text{CuCo}_2\text{O}_4@\text{CuCo}_2\text{O}_4$  electrode at different scan rates.

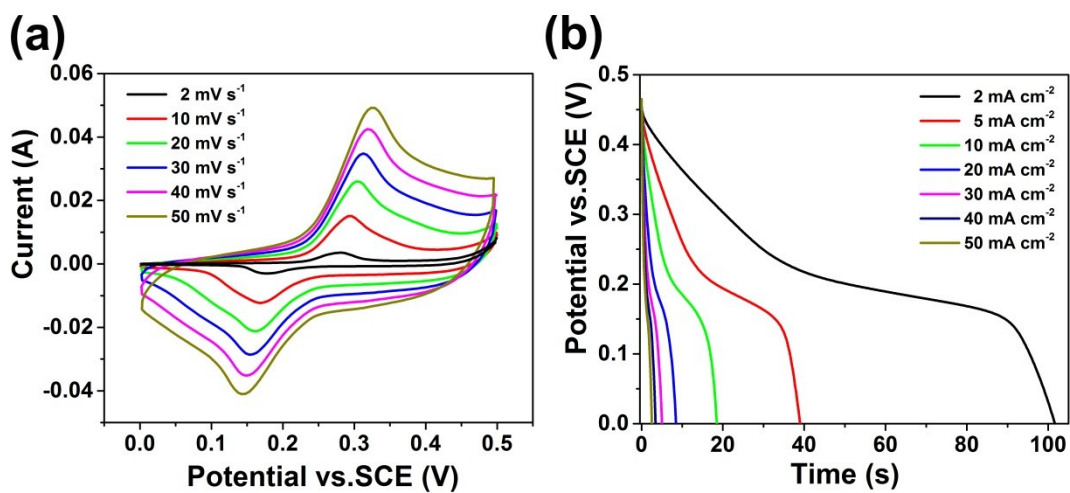

**Fig. S3** (a) CV curves of the  $\text{CuCo}_2\text{O}_4$  electrode at various scan rate. (b) Galvanostatic charge-discharge curves of the  $\text{CuCo}_2\text{O}_4$  electrode at various current densities.

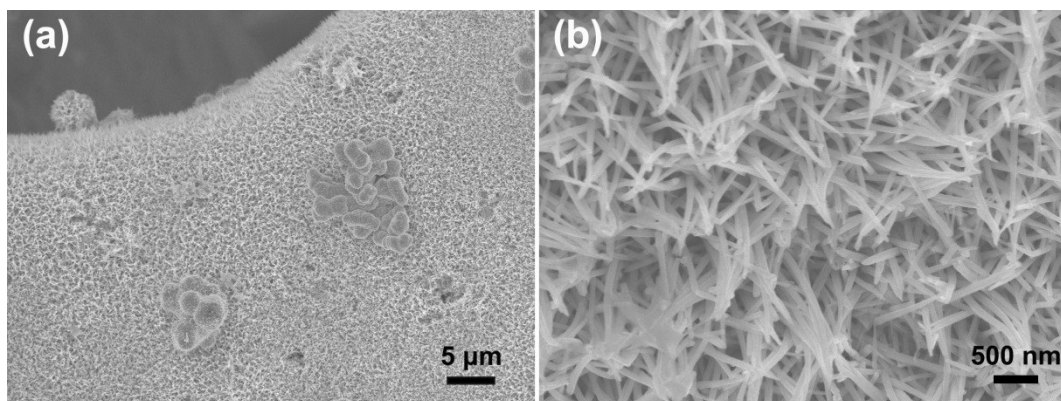

**Fig. S4** Typical SEM images the CuCo<sub>2</sub>O<sub>4</sub> electrode (a) and (b) after 2000 cycles at different magnifications.

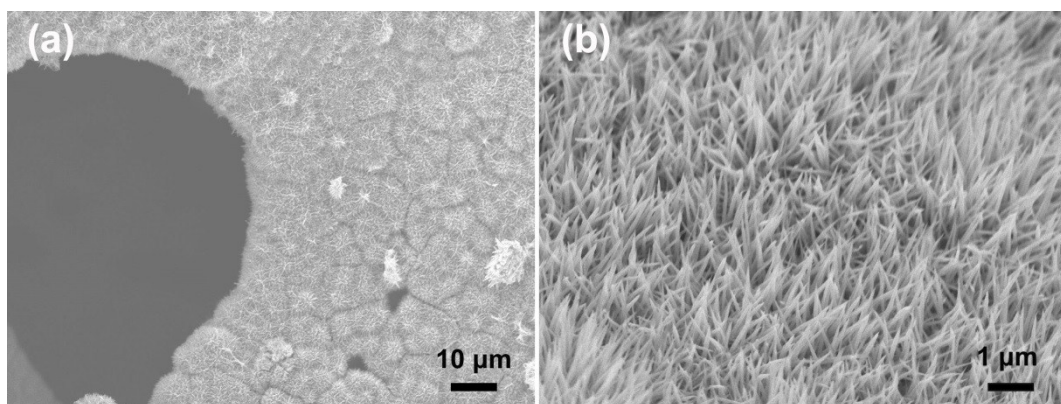

**Fig. S5** Typical SEM images the CuCo<sub>2</sub>O<sub>4</sub>@CuCo<sub>2</sub>O<sub>4</sub> electrode (a) and (b) after 2000 cycles at different magnifications.
